# Supplementary material for: A survey of microRNA single nucleotide polymorphisms identifies novel breast cancer susceptibility loci in a case-control, population-based study of African-American women
Source: Breast Cancer Res. 2018 Jun 5;20:45. doi: 10.1186/s13058-018-0964-4 (PMC5989404; doi:10.1186/s13058-018-0964-4)
Supplement: Supplementary file 1 — Table S1. Association of the top seven miRNA SNPs from the full analyses with p < 5 × 10−6 in case versus control and case-only subtype analyses. (XLSX 72 kb) [file 13058_2018_964_MOESM1_ESM.xlsx]

## Sheet: summary_replication_subtypes
Table S1. Association of top 7 miRNA SNPs from the full analyses with p-values < 5x10-6, in case v. control and case-only subtype analyses.
Analysis, sample size	SNP	Chromosome:Position*	Effect/ Other allele	EAF	OR	95LCI	95UCI	p-value**	FDR p-value***	Sample size
ER+ versus controls	rs142882938	17:79010031	C/CT	0.0542	1.5535	1.30944	1.84305	4.44e-07	0.0277765	6670
	rs4969239	17:79010544	G/A	0.0768	1.3823	1.19684	1.59649	1.047e-05	0.450244	6670
	rs28585511	17:79010609	T/A	0.0542	1.5532	1.30919	1.8427	4.445e-07	0.0277765	6670
	rs4969351	17:79011141	A/G	0.0734	1.389	1.19747	1.61116	1.405e-05	0.450244	6670
	rs9913477	17:79015698	G/A	0.058	1.5308	1.29791	1.80547	4.29e-07	0.0277765	6670
	rs7502931	17:79018677	G/A	0.0581	1.5268	1.29452	1.80076	4.953e-07	0.0277765	6670
	rs4969366	17:79026572	G/A	0.0471	1.4776	1.23283	1.77096	2.407e-05	0.520425	6670
ER- versus controls	rs142882938	17:79010031	C/CT	0.0515	1.3856	1.11359	1.72404	0.003441	0.981148	5785
	rs4969239	17:79010544	G/A	0.0744	1.2927	1.07624	1.5527	0.006025	0.981148	5785
	rs28585511	17:79010609	T/A	0.0515	1.3852	1.11349	1.72321	0.003453	0.981148	5785
	rs4969351	17:79011141	A/G	0.0707	1.263	1.04494	1.52657	0.01569	0.981148	5785
	rs9913477	17:79015698	G/A	0.0554	1.3949	1.13034	1.72139	0.001921	0.981148	5785
	rs7502931	17:79018677	G/A	0.0555	1.391	1.1274	1.71624	0.00209	0.981148	5785
	rs4969366	17:79026572	G/A	0.0462	1.4707	1.1746	1.84144	0.0007739	0.981148	5785
ER+ versus ER- cases	rs142882938	17:79010031	C/CT	0.0678	1.0651	0.858027	1.32215	0.5676	0.986008	3081
	rs4969239	17:79010544	G/A	0.0915	1.0328	0.857839	1.24344	0.7329	0.991523	3081
	rs28585511	17:79010609	T/A	0.0677	1.0653	0.858357	1.32214	0.5662	0.986008	3081
	rs4969351	17:79011141	A/G	0.0872	1.0575	0.873034	1.28094	0.5675	0.986008	3081
	rs9913477	17:79015698	G/A	0.0719	1.048	0.85023	1.29177	0.6602	0.989504	3081
	rs7502931	17:79018677	G/A	0.0718	1.0483	0.850307	1.2924	0.659	0.989504	3081
	rs4969366	17:79026572	G/A	0.0591	0.9636	0.771256	1.20391	0.7444	0.991523	3081
PR+ versus controls	rs142882938	17:79010031	C/CT	0.0533	1.5332	1.27522	1.84337	5.432e-06	0.202984	6267
	rs4969239	17:79010544	G/A	0.0764	1.3954	1.19547	1.62877	2.437e-05	0.546397	6267
	rs28585511	17:79010609	T/A	0.0533	1.5334	1.27563	1.84325	5.343e-06	0.202984	6267
	rs4969351	17:79011141	A/G	0.0728	1.3962	1.19031	1.63771	4.153e-05	0.701084	6267
	rs9913477	17:79015698	G/A	0.0574	1.544	1.29329	1.84331	1.547e-06	0.132881	6267
	rs7502931	17:79018677	G/A	0.0574	1.5402	1.29011	1.83877	1.751e-06	0.132881	6267
	rs4969366	17:79026572	G/A	0.0465	1.4795	1.21712	1.79844	8.377e-05	0.701084	6030
PR- versus controls	rs142882938	17:79010031	C/CT	0.053	1.5344	1.25784	1.87177	2.421e-05	0.918143	6030
	rs4969239	17:79010544	G/A	0.0756	1.3759	1.16361	1.62692	0.0001885	0.918143	6030
	rs28585511	17:79010609	T/A	0.0529	1.5333	1.25694	1.87043	2.485e-05	0.918143	6030
	rs4969351	17:79011141	A/G	0.072	1.3592	1.14364	1.61538	0.0004963	0.918143	6030
	rs9913477	17:79015698	G/A	0.0566	1.4985	1.23638	1.81619	3.759e-05	0.918143	6030
	rs7502931	17:79018677	G/A	0.0567	1.4948	1.23333	1.81171	4.151e-05	0.918143	6030
	rs4969366	17:79026572	G/A	0.047	1.5534	1.26273	1.91098	3.07e-05	0.918143	6030
PR+ versus PR- cases	rs142882938	17:79010031	C/CT	0.0693	0.9911	0.804068	1.22164	0.9333	0.997888	2923
	rs4969239	17:79010544	G/A	0.0936	1.0114	0.844522	1.21125	0.902	0.997888	2923
	rs28585511	17:79010609	T/A	0.0693	0.9921	0.804879	1.22287	0.9405	0.998072	2923
	rs4969351	17:79011141	A/G	0.0891	1.0213	0.848121	1.22984	0.8238	0.996561	2923
	rs9913477	17:79015698	G/A	0.0736	1.0148	0.828475	1.24303	0.8872	0.997888	2923
	rs7502931	17:79018677	G/A	0.0735	1.014	0.82766	1.24229	0.8931	0.997888	2923
	rs4969366	17:79026572	G/A	0.0601	0.9395	0.75492	1.16921	0.576	0.995122	2923
ER+/PR+ versus controls	rs142882938	17:79010031	C/CT	0.0529	1.508	1.2496	1.81984	1.857e-05	0.520501	6169
	rs4969239	17:79010544	G/A	0.0762	1.3995	1.19593	1.63772	2.793e-05	0.617864	6169
	rs28585511	17:79010609	T/A	0.0529	1.5082	1.24976	1.82008	1.826e-05	0.520501	6169
	rs4969351	17:79011141	A/G	0.0726	1.3964	1.18721	1.64244	5.536e-05	0.64593	6169
	rs9913477	17:79015698	G/A	0.057	1.526	1.27372	1.82825	4.513e-06	0.379178	6169
	rs7502931	17:79018677	G/A	0.057	1.5223	1.27088	1.82346	5.073e-06	0.379178	6169
	rs4969366	17:79026572	G/A	0.046	1.4438	1.18218	1.76332	0.0003155	0.64593	6169
ER-/PR- versus controls	rs142882938	17:79010031	C/CT	0.0513	1.3862	1.10559	1.73803	0.004654	0.91014	5564
	rs4969239	17:79010544	G/A	0.0744	1.3177	1.09105	1.59143	0.004172	0.91014	5564
	rs28585511	17:79010609	T/A	0.0513	1.3858	1.10527	1.73752	0.004675	0.91014	5564
	rs4969351	17:79011141	A/G	0.0707	1.2839	1.05621	1.56067	0.01212	0.939256	5564
	rs9913477	17:79015698	G/A	0.0551	1.3979	1.12436	1.73799	0.002559	0.908866	5564
	rs7502931	17:79018677	G/A	0.0552	1.3938	1.12128	1.73255	0.002789	0.908866	5564
	rs4969366	17:79026572	G/A	0.0458	1.4616	1.45749	1.46572	0.001435	0.908866	5564
ER/PR+ versus ER/PR- cases	rs142882938	17:79010031	C/CT	0.0674	1.0629	0.838649	1.34711	0.614	0.983389	2459
	rs4969239	17:79010544	G/A	0.0937	1.0565	0.863364	1.29284	0.5934	0.981937	2459
	rs28585511	17:79010609	T/A	0.0673	1.0635	0.839122	1.34788	0.6106	0.983389	2459
	rs4969351	17:79011141	A/G	0.0889	1.0771	0.87401	1.32738	0.4862	0.975328	2459
	rs9913477	17:79015698	G/A	0.0724	1.0674	0.849328	1.34146	0.5762	0.980485	2459
	rs7502931	17:79018677	G/A	0.0723	1.0673	0.849082	1.3416	0.5767	0.980485	2459
	rs4969366	17:79026572	G/A	0.0587	0.9706	0.759842	1.23982	0.811	0.9922	2459
Abbreviations: OR: odds ratio; 95% CI of the OR; EAF: effect allele frequency; FDR: false discovery rate;info(r2): imputation quality score
* Human Genome GRCh37/hg19 assembly, NT_010783.15
** Additive genetic models were adjusted for age group (by ~10 year intervals), study site, geographic region of residence, DNA source, and ancestry (PCs 5,6,8 - associated with cancer trait, p-value<0.1 ).
***Adjustment for multiple comparisons using the False Discovery Rate (FDR)
